# Supplementary material for: On the linkage between future Arctic sea ice retreat, Euro-Atlantic circulation regimes and temperature extremes over Europe
Source: Copernicus journal article supplement (doi:10.5194/wcd-4-663-2023), 2023-07-31
Supplement: Supplementary file 1 [file wcd-4-663-2023-supplement.pdf]

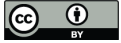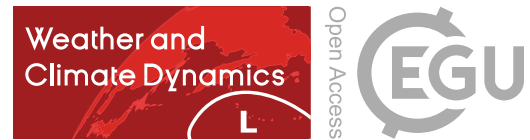

*Supplement of*

## **On the linkage between future Arctic sea ice retreat, Euro-Atlantic circulation regimes and temperature extremes over Europe**

**Johannes Riebold et al.**

*Correspondence to:* Johannes Riebold ([johannes.riebold@awi.de](mailto:johannes.riebold@awi.de))

The copyright of individual parts of the supplement might differ from the article licence.

**Supporting information for the paper “On the linkage between future Arctic sea ice retreat, Euro-Atlantic circulation regimes and temperature extremes over Europe”**

**Table S1:** List of PAMIP models that were used for the analysis in Figs. 2, S4 and S5. Listed is also the available ensemble size for each experimental setup (in number of years)

| <b>Institute</b>                                                                               | <b>Model</b>    | <b>pdSIC</b> | <b>futArcSIC</b> | <b>futBKSIC</b> |
|------------------------------------------------------------------------------------------------|-----------------|--------------|------------------|-----------------|
| Max Planck Institute for Meteorology, Hamburg                                                  | ECHAM6          | 100          | 100              | 100             |
| National Center for Atmospheric Research<br>Canadian                                           | CESM2           | 200          | 200              | -               |
| Norwegian Meteorological Institute                                                             | NorESM2-LM      | 200          | 200              | -               |
| University of Tokyo/National Institute for Environmental Studies/Japan Agency for Marine-Earth | MIROC6          | 100          | 100              | 100             |
| Canadian Centre for Climate Modelling and Analysis                                             | CanESM5         | 300          | 300              | -               |
| US Department of Energy/University of California Irvine                                        | E3SMv1          | 185          | 190              | 100             |
| Met Office UK                                                                                  | HadGEM3-GC31-MM | 300          | 300              | 200             |
| National Center of Atmospheric Research/<br>University of California Irvine                    | CESM1-WACCM-SC  | 300          | 100              | 100             |
| Institute of Atmospheric Physics, Beijing                                                      | FGOALS-f3-L     | 100          | 100              | -               |
| Centre Européen de Recherche et de Formation Avancée en Calcul Scientifique<br>US              | CNRM-CM6-1      | 300          | 300              | -               |
| Institute Pierre Simon Laplace<br>University                                                   | IPSL-CM6A-LR    | 200          | 200              | 100             |

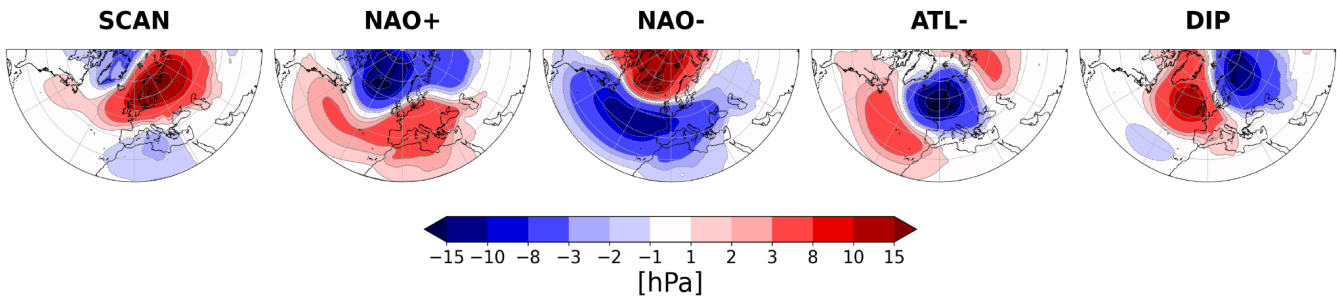

**Figure S1:** Five circulation regimes over the Euro-Atlantic domain computed from daily ERA5 sea level pressure anomaly data (1979--2018) for extended winter season (December, January, February, March).

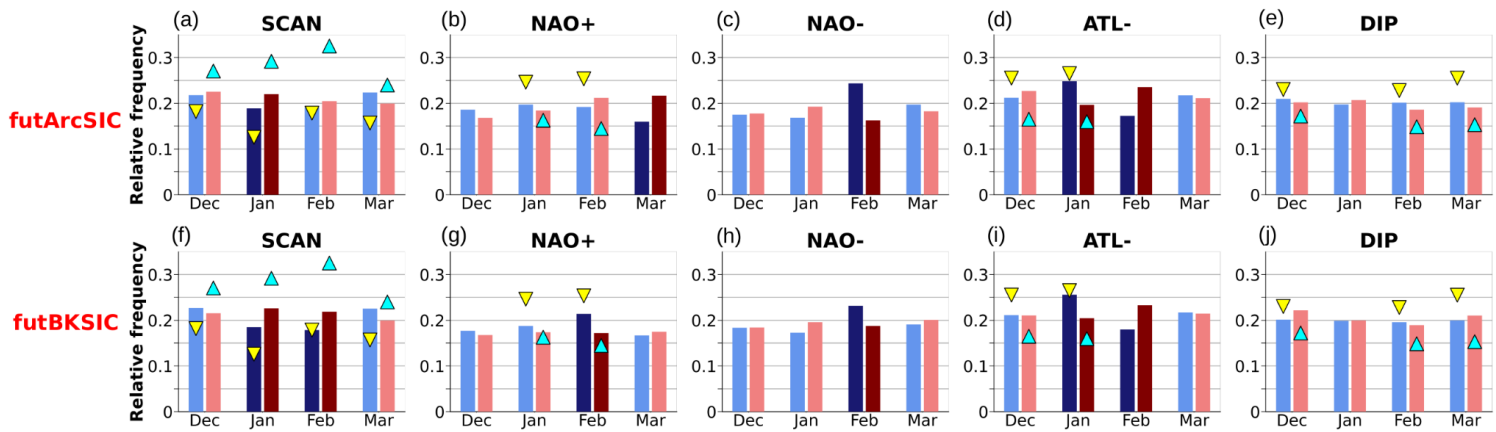

**Figure S2:** Relative regime occurrence frequencies in ECHAM6 for different winter months compared between the pdSIC reference simulation (blueish bars) and the futArcSIC (upper row, redish bars), as well as the futBKSIC sensitivity simulation (lower row, redish bars). Light redish and blueish bars indicate non-significant frequency differences between reference and sensitivity simulations, whereas the paired dark blueish/redish bars indicate significant differences in occurrence frequencies. Note that by definition the sum over all clusters for a specific month in a given simulation is one. The triangles indicate the respective ERA5 regime occurrence frequencies for recent low (upright bright-blueish triangles) and high (inverted yellow triangles) detrended Arctic sea ice conditions. Only ERA5 occurrence frequencies for months where significant differences between low and high ice conditions were found are shown here. Significant differences are derived from a moving block bootstrap. The absolute numbers of regime day counts in ECHAM6 and ERA5 that were used for the computation are shown in Tabs. S2–S4.

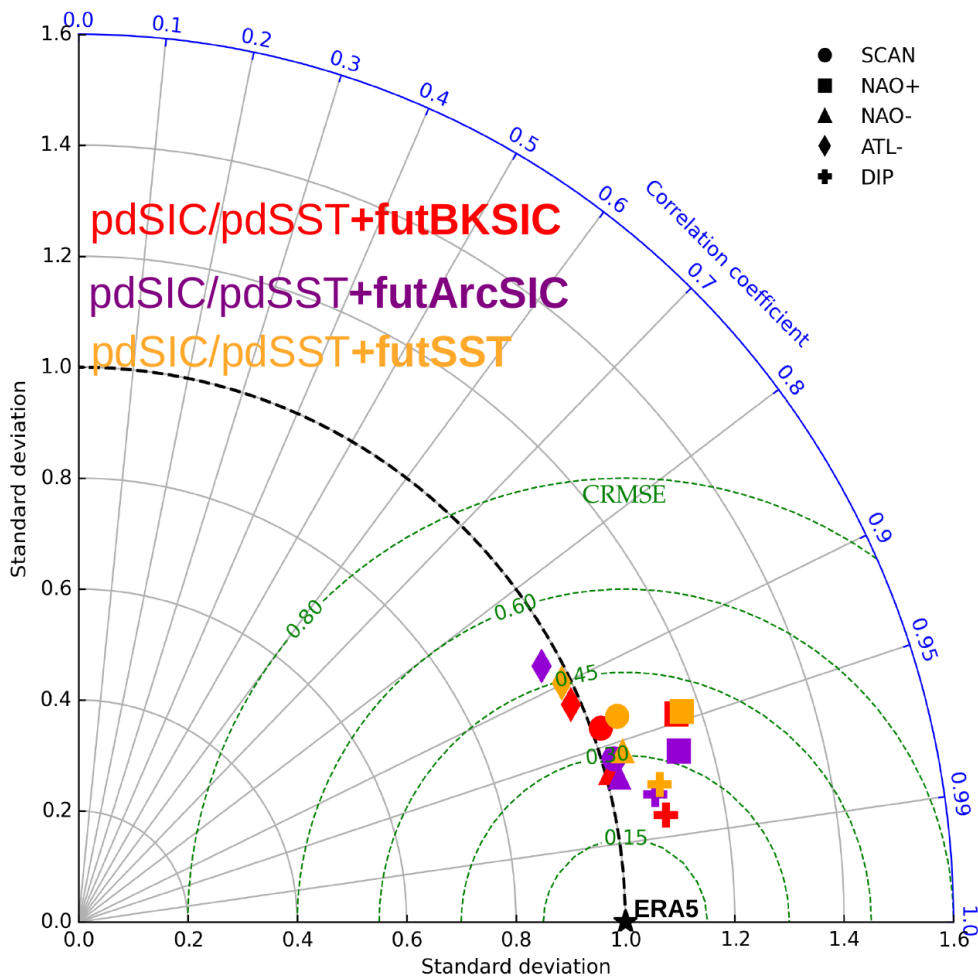

**Figure S3:** Taylor diagram (Taylor 2001) that summarizes different statistics in order to compare computed ECHAM6 model patterns with regime patterns obtained from ERA5. Different symbols indicate different regimes and different colors stand for different combinations of model simulations for which regimes are computed in this study. The black star symbolically indicates the ERA5 reference pattern. The concentric quadrants centered around the origin show the pattern standard deviation of the different model patterns relative to the standard deviation of the ERA5 reference patterns. The blue polar axis depicts the pattern correlation coefficient between the respective model patterns and the reanalysis pattern. The green concentric semicircles centered around the black reference point indicate the centered root mean square error (CRMSE) when comparing model and reanalysis patterns. Thus, model symbols close to the reference star mean high resemblance between model and reanalysis pattern.

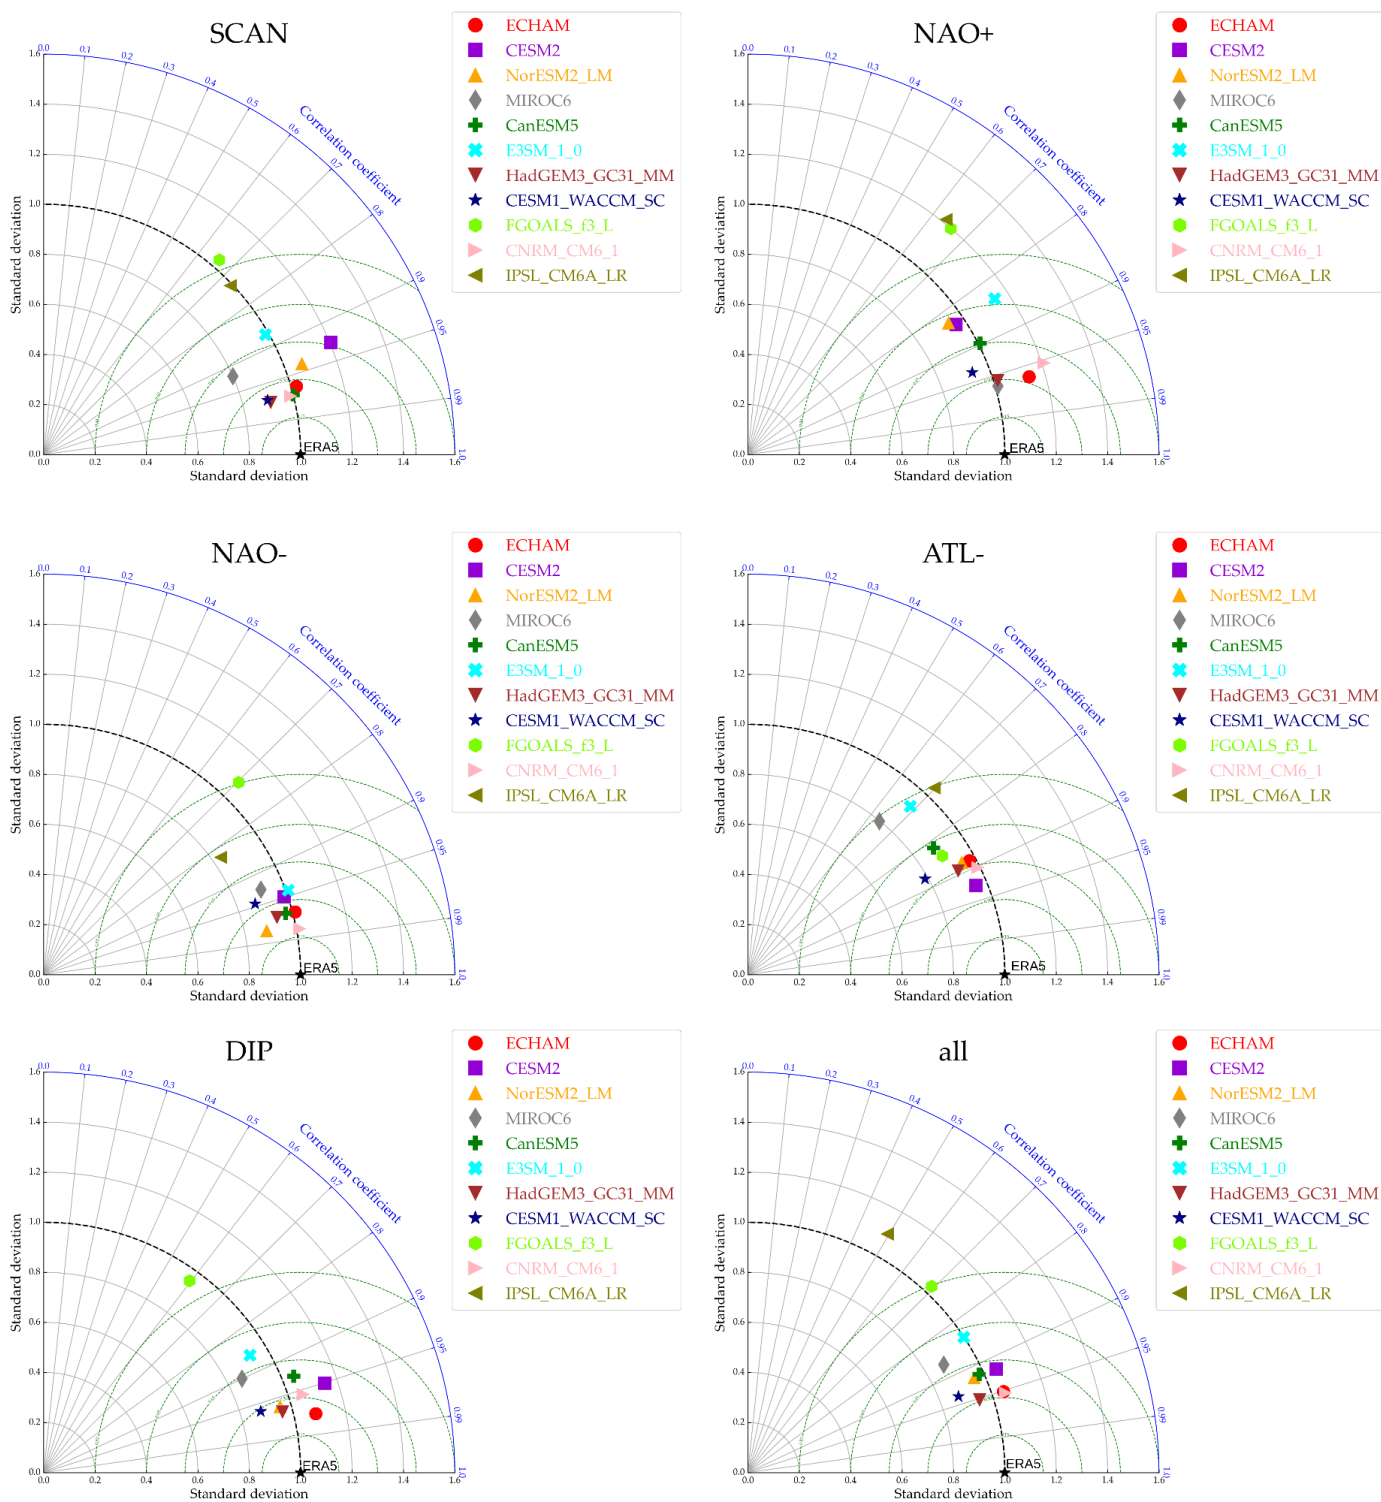

**Figure S4:** Taylor diagrams that summarize different statistics in order to compare computed model patterns from different PAMIP models with regime patterns obtained from ERA5 (see e.g. Fig. S1). Different symbols/colors indicate different models. Regimes were computed by merging the pdSIC with the futArcSIC data set. Individual Taylor diagrams compare individual model regimes with the respective ERA5 regimes. The Taylor diagram in the lower right (“all”) compares the statistics averaged over all regimes.

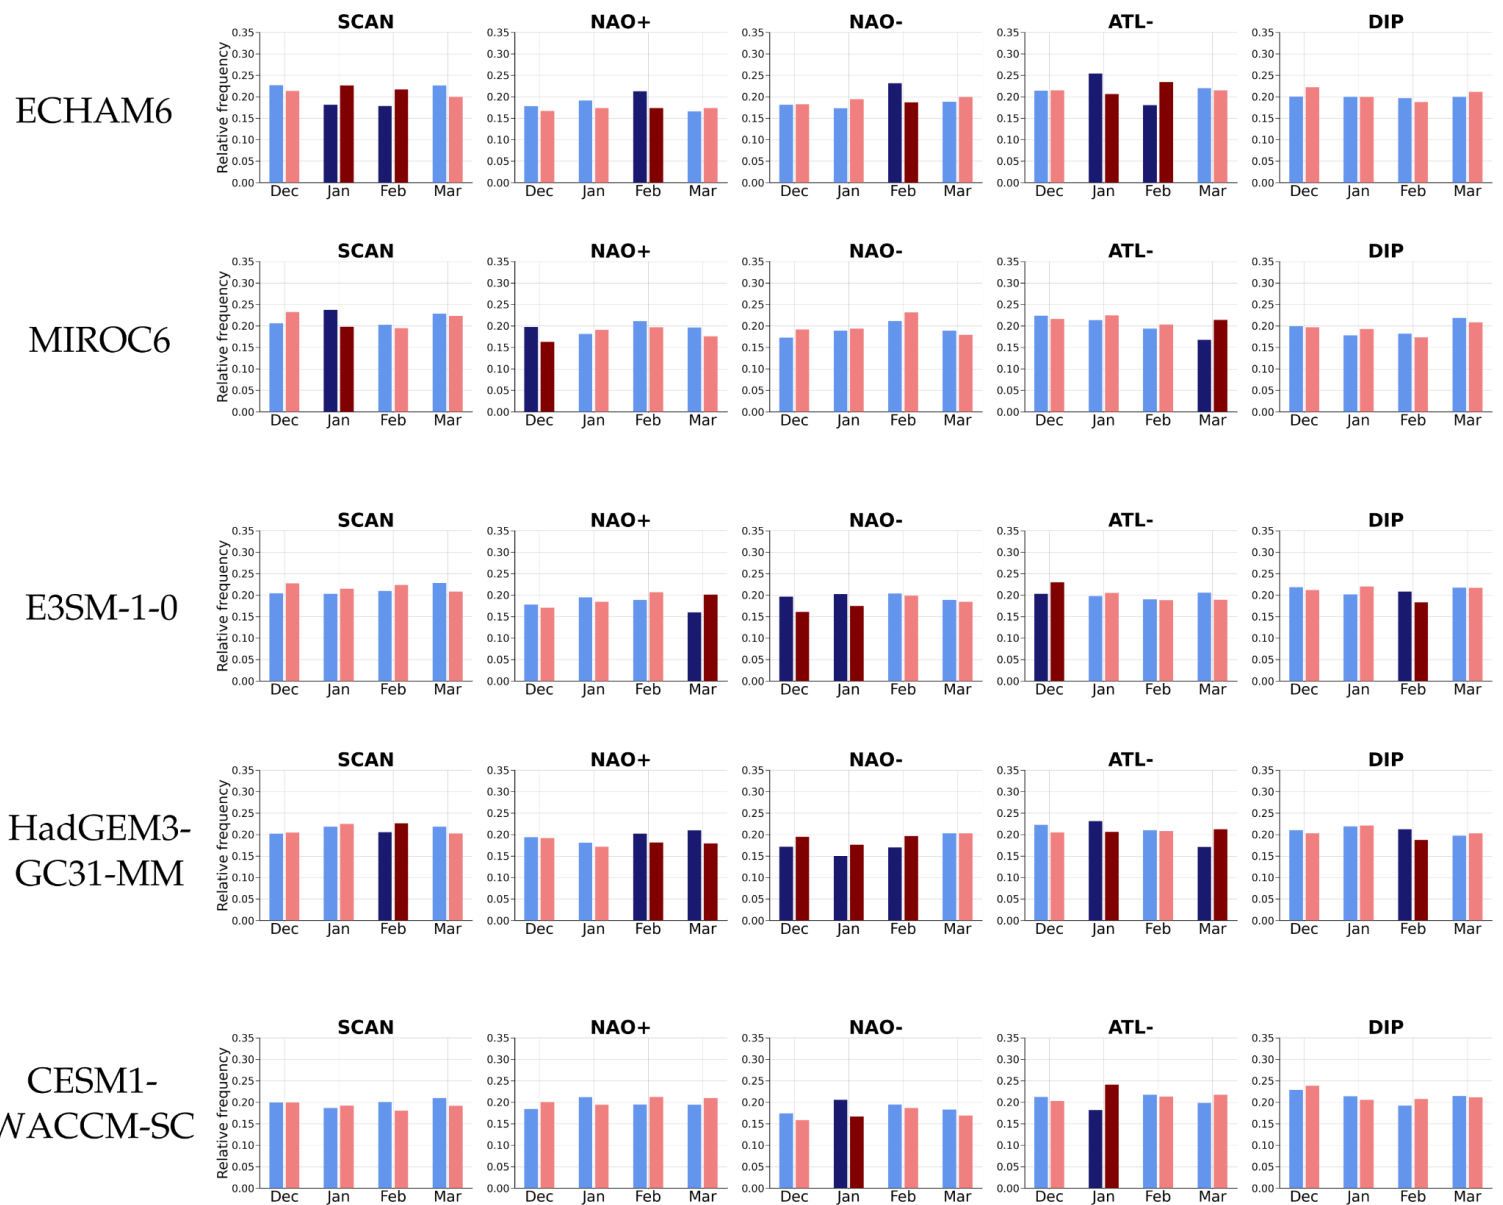

**Figure S5:** Relative regime occurrence frequencies for different winter months as in Fig. 2. Compared are the **pdsIC** reference simulation (blueish bars) and the **futBKSIC** experiment (redish bars). Only the five available models that according to Fig. S4 are able to realistically reproduce the regime pattern structure were considered here. Dark-colored bars indicate significant differences.

**Table S2:** Absolute number of regime days for each winter month that were used for the computation of the ERA5 regime frequencies in Fig. S2. Blue numbers indicate the number of regime days for **high** Arctic sea ice conditions, red numbers for **low** sea ice conditions.

|                 | SCAN    | NAO+    | NAO-    | ATL-    | DIP     |
|-----------------|---------|---------|---------|---------|---------|
| <b>December</b> | 112/168 | 115/124 | 94/119  | 156/102 | 143/107 |
| <b>January</b>  | 81/181  | 151/100 | 94/110  | 163/100 | 131/129 |
| <b>February</b> | 100/183 | 142/82  | 94/94   | 96/119  | 128/82  |
| <b>March</b>    | 98/147  | 142/137 | 114/127 | 107/116 | 159/93. |

**Table S3:** Absolute number of regime days for each winter month that were used for the computation of the relative frequencies in Figs. S2a–e. Blue numbers indicate the day count for the (100 year-long) ECHAM6 **pdSIC** experiment, red numbers for the (100 year-long) ECHAM6 **futArcSIC** experiment. Note, that the sum over all regimes for a specific month and an experiment sums up to 100 times the number of days within the respective month (e.g. 100\*31 days =3100 days for December).

|                 | SCAN    | NAO+    | NAO-    | ATL-    | DIP     |
|-----------------|---------|---------|---------|---------|---------|
| <b>December</b> | 676/699 | 576/521 | 540/552 | 657/702 | 651/626 |
| <b>January</b>  | 585/682 | 610/569 | 522/596 | 770/611 | 613/642 |
| <b>February</b> | 534/572 | 536/594 | 682/455 | 484/660 | 564/519 |
| <b>March</b>    | 693/619 | 494/671 | 612/566 | 674/654 | 627/590 |

**Table S4:** Same as Table S3 but for **pdSIC** and **futBKSIC**. Blue numbers indicate the day count for the (100 year-long) ECHAM6 **pdSIC** experiment, red numbers indicate the counts for the (100 year-long) ECHAM6 **futBKSIC** experiment that were used for the computation of the relative frequencies in Figs. S2f–j .

|                 | SCAN     | NAO+     | NAO-     | ATL-     | DIP      |
|-----------------|----------|----------|----------|----------|----------|
| <b>December</b> | 706/ 666 | 546/ 521 | 564/ 567 | 662/ 654 | 622/ 692 |
| <b>January</b>  | 567/ 703 | 585/ 537 | 534/ 605 | 792/ 634 | 622/ 621 |
| <b>February</b> | 498/ 612 | 598/ 482 | 646/ 524 | 505/ 652 | 553/ 530 |
| <b>March</b>    | 700/ 618 | 518/ 542 | 585/ 619 | 679/ 666 | 618/ 655 |

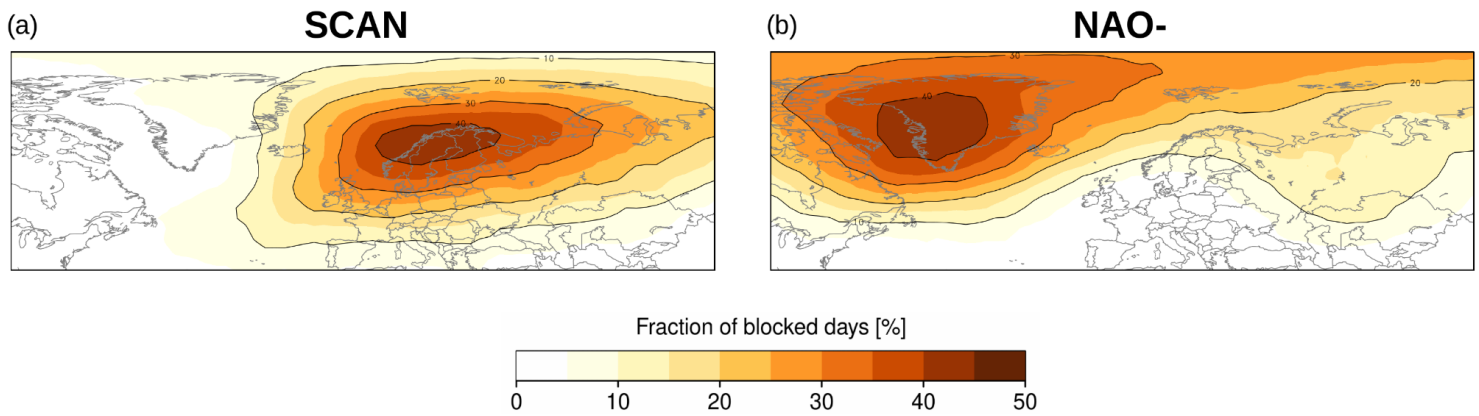

**Figure S6:** Mean DJFM relative blocking frequency (fraction of blocked days) at the same time a SCAN or negative NAO regime is present in ECHAM6 PAMIP pdSIC simulation. Blocking frequency is calculated at a grid point level based on a hybrid, two-dimensional blocking index. Daily blocked grid points were identified based on the inversion of meridional gradients in the 500 hPa geopotential height (gph) field according to a modified version of the index from Scherrer et al. (2006), and on areas of strong positive gph anomalies associated with the blocking detection. Finally, blocking events of a duration of at least 4 days and an area of  $1.5 \times 10^6 \text{ km}^2$  were selected by a subsequent tracking algorithm described in Schuster et al. (2019).

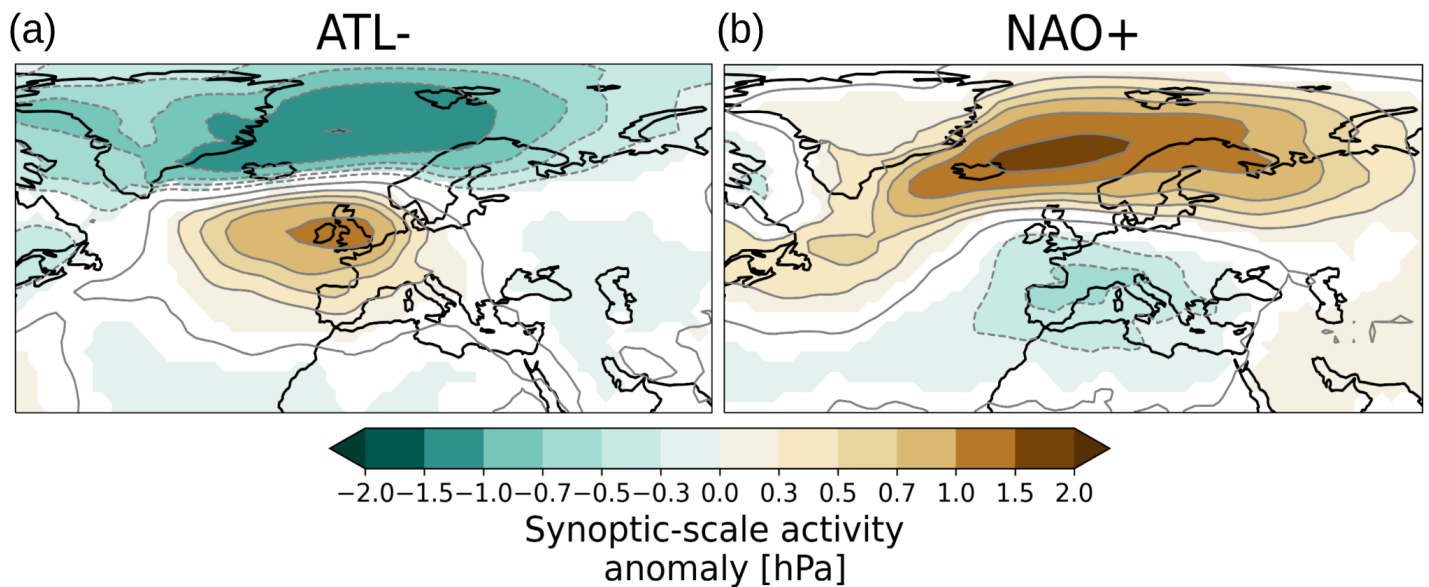

**Figure S7:** Synoptic-scale activity anomalies (DJFM) for the ATL- and NAO+ regimes computed from ECHAM6 pdSIC model data. Synoptic-scale activity is computed here as the 2–6 day bandpass filtered standard deviation of slp data (Blackmon, 1976). It provides a measure for baroclinic activity and characterizes stormtrack locations. Only anomalies that significantly differ from zero are shown in colors.



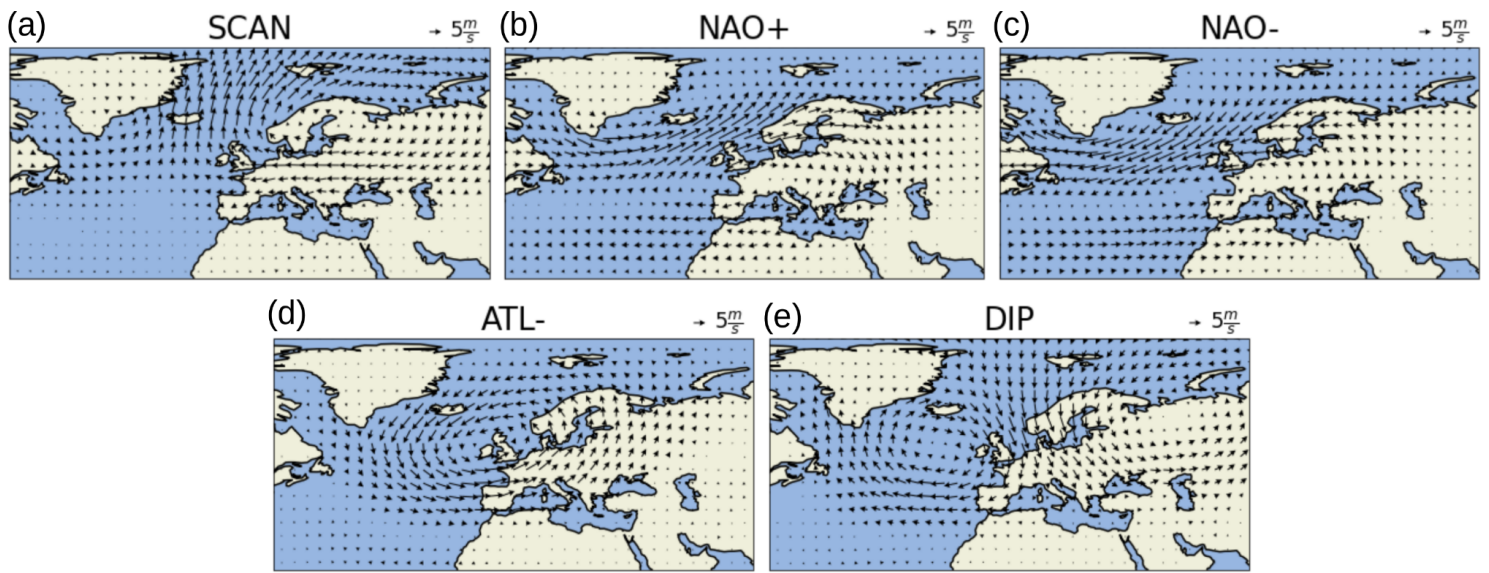

**Figure S8:** Wind anomalies at 700 hPa (DJFM) for the circulation regimes computed from ECHAM6 pdSIC model data.

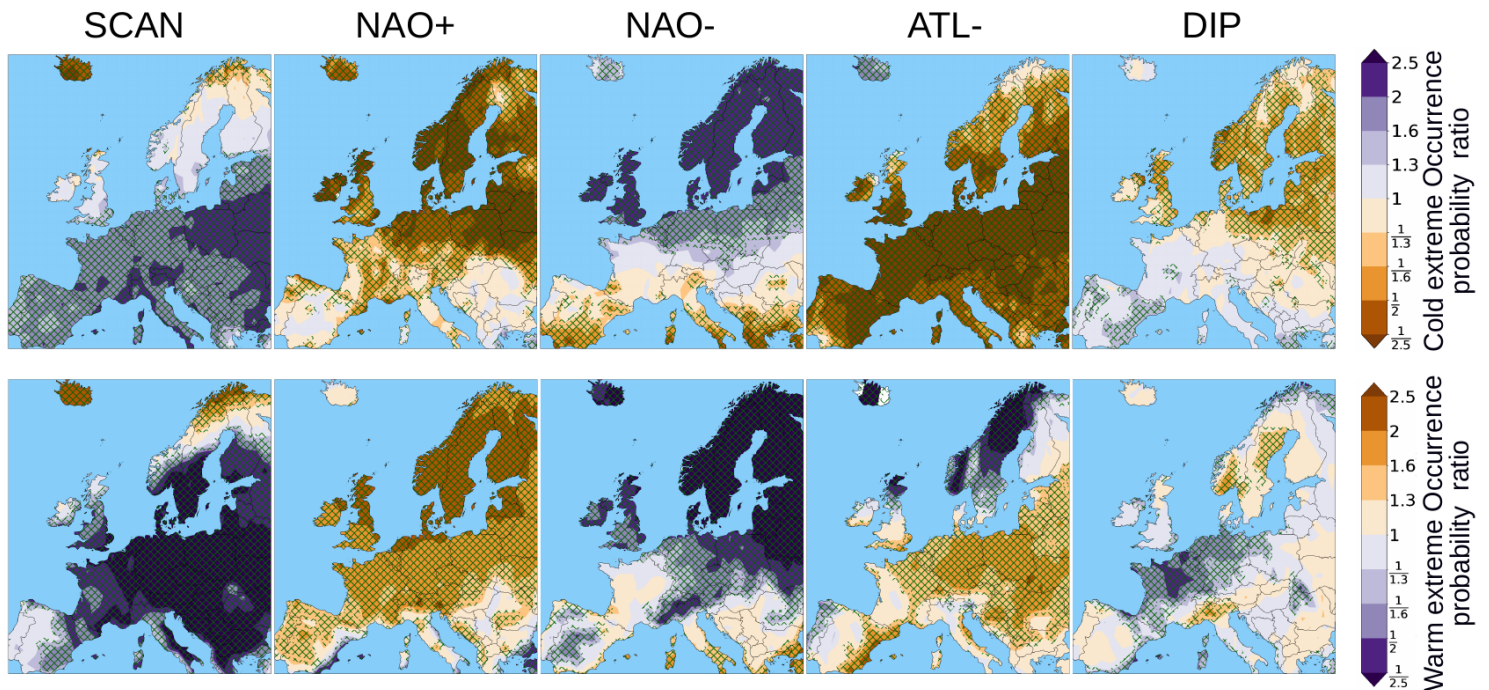

**Figure S9:** Same analysis as in Fig. 3, but for ERA5 over the period 1979–2018. Thus, regime patterns computed from ERA5 were used for computing these plots. ERA5 T2max/T2min times series at each grid point were linearly detrended beforehand.

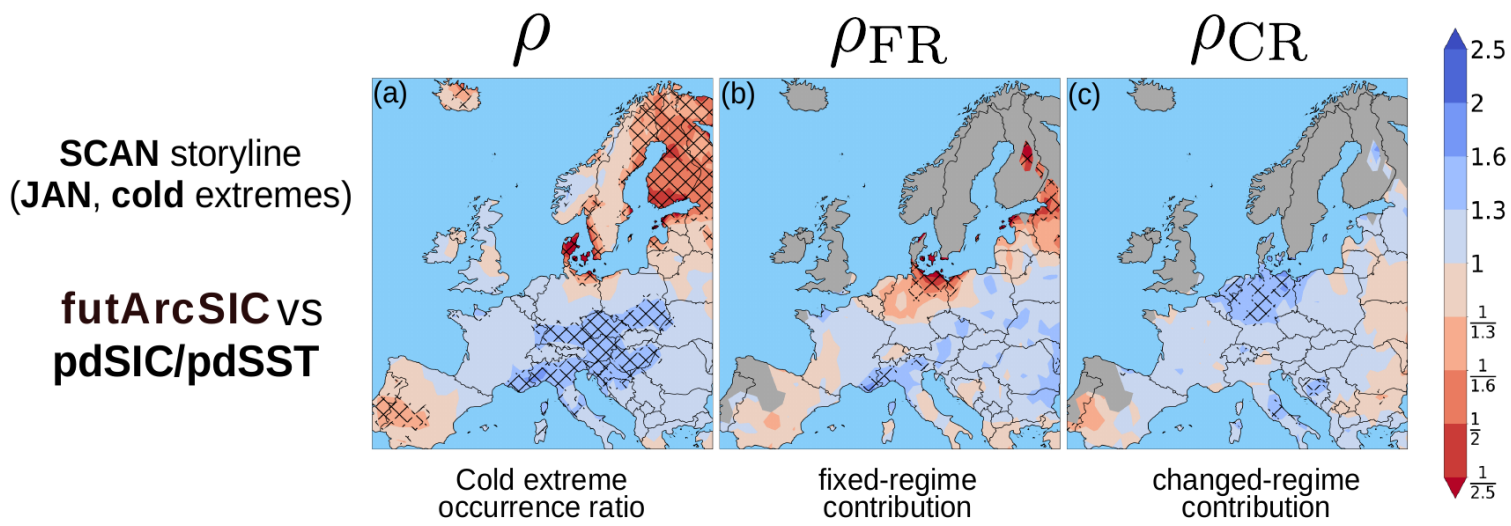

**Figure S10:** Same as in Fig. 6 but comparing the ECHAM6 futArcSIC and pdSIC simulations, and only for January cold extremes along a SCAN regime storyline. Occurrence ratio of SCAN regime occurrence in January is given as  $\rho_{circ} = 1.17$ . Thus, the SCAN occurs more frequently in the ECHAM6 futArcSIC simulation.

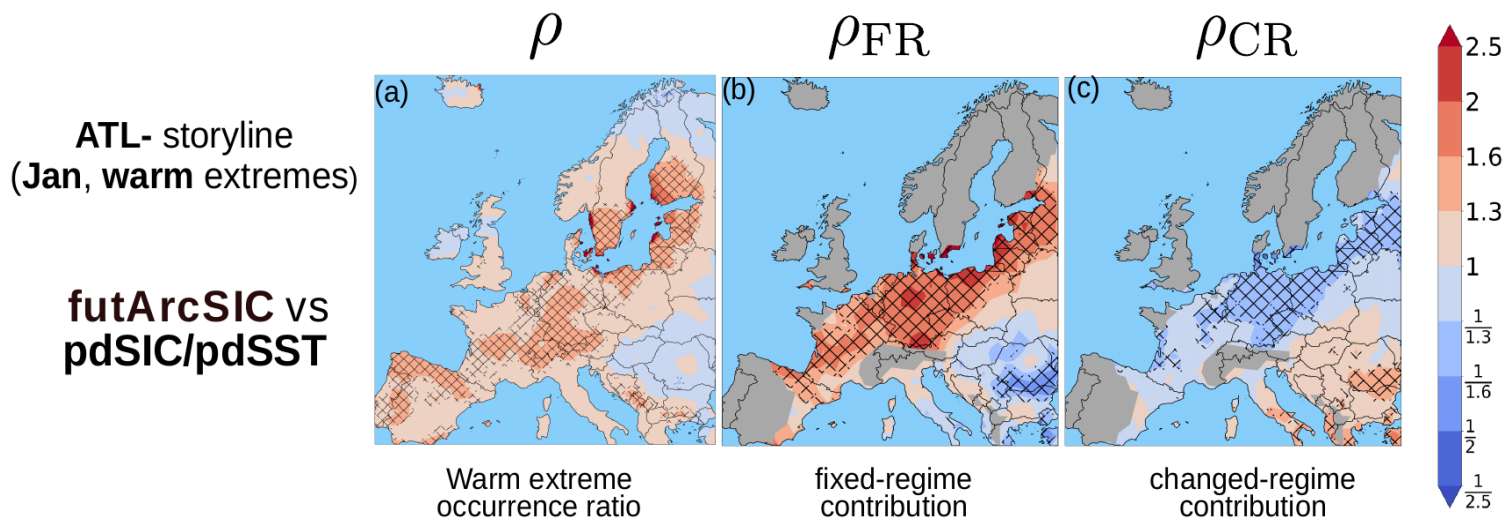

**Figure S11:** Same as in Fig. 7 but comparing the ECHAM6 futArcSIC and pdSIC simulations, and for January warm extremes along a ATL- regime storyline. Occurrence ratio of ATL- regime occurrence in January is given as  $\rho_{circ} = 0.79$ . Thus, the ATL- regime occurs less frequently in the ECHAM6 futArcSIC simulation.

## **References:**

Taylor, K. E.: Summarizing multiple aspects of model performance in a single diagram, *J. Geophys. Res. Atmos.*, 106, 7183–7192, <https://doi.org/10.1029/2000JD900719>, 2001.

Blackmon, M. L.: A climatological spectral study of the 500 mb geopotential height of the Northern Hemisphere., *J. Atmos. Sci.*, 33, 1607–1623, [https://doi.org/10.1175/1520-0469\(1976\)033<1607:ACSSOT>2.0.CO;2](https://doi.org/10.1175/1520-0469(1976)033<1607:ACSSOT>2.0.CO;2), 1976.

Schuster, M., Grieger, J., Richling, A., Schartner, T., Illing, S., Kadow, C., Müller, W. A., Pohlmann, H., Pfahl, S., and Ulbrich, U.: Improvement in the decadal prediction skill of the North Atlantic extratropical winter circulation through increased model resolution, *Earth Syst. Dyn.*, 10, 901–917, <https://doi.org/10.5194/esd-10-901-2019>, 2019.

Scherrer, S. C., Croci-Maspoli, M., Schwierz, C., and Appenzeller, C.: Two-dimensional indices of atmospheric blocking and their statistical relationship with winter climate patterns in the Euro-Atlantic region, *Int. J. Climatol.*, 26, 233–249, <https://doi.org/10.1002/joc.1250>, 2006.
